# Supplementary material
Source: PubMed Central journal article supplement (PMC4306040)
Supplement: NIHMS640111-supplement-01.pdf [file NIHMS640111-supplement-01.pdf]

## Supplementary appendix

This appendix formed part of the original submission and has been peer reviewed. We post it as supplied by the authors.

Supplement to: Bhatt SP, Wells JM, Kim V, et al. Radiological correlates and clinical implications of the paradoxical lung function response to  $\beta_2$  agonists: an observational study. *Lancet Respir Med* 2014; published online Sept 10. [http://dx.doi.org/10.1016/S2213-2600\(14\)70185-7](http://dx.doi.org/10.1016/S2213-2600(14)70185-7).

## Supplemental Tables

**Table 1: Predictors of Paradoxical Response defined by 10% reduction in FEV<sub>1</sub>: Multivariate Logistic regression**

| Predictor                         | Unadjusted Odds Ratio | 95% CI       | Adjusted Odds Ratio | 95% CI       |
|-----------------------------------|-----------------------|--------------|---------------------|--------------|
| Age (per ten years)               | 0.99                  | 0.98 to 1.0  | 1.13                | 0.92 to 1.37 |
| Female gender                     | 0.80                  | 0.63 to 1.02 | 0.86                | 0.63 to 1.18 |
| African American Race             | 2.20 †                | 1.73 to 2.81 | 2.26 †              | 1.67 to 3.05 |
| Current smoking                   | 1.47 **               | 1.15 to 1.89 | 1.17                | 0.85 to 1.61 |
| Packyears                         | 1.01 **               | 1.0 to 1.01  | 1.01 *              | 1.0 to 1.01  |
| Respiratory medications#          | 1.25                  | 0.96 to 1.62 | 1.23                | 0.86 to 1.74 |
| Pre-bronchodilator FEV1           | 0.90                  | 0.79 to 1.03 | 1.11                | 0.88 to 1.41 |
| Emphysema (Perc15 for every 10HU) | 0.96 *                | 0.92 to 1.0  | 0.99                | 0.95 to 1.04 |
| Wall Area%                        | 1.10 †                | 1.06 to 1.14 | 1.08 †              | 1.04 to 1.12 |

\*p<0.05. \*\*p,0.01. †p<0.001

FEV<sub>1</sub> = Forced Expiratory Volume in the first second. Perc15 = the density of lung in HU below which 15% of the voxels had the lowest attenuation numbers at full inspiration. Wallarea% = Bronchial wall area at segmental level. #Respiratory medications include one or more of inhaled long acting beta agonists, long acting antimuscarinic agents or a combination of inhaled corticosteroids/long acting beta agonists.

**Table 2: Predictors of Paradoxical Response defined by 15% reduction in FEV<sub>1</sub>: Multivariate Logistic regression**

| Predictor                          | Unadjusted Odds Ratio | 95% CI       | Adjusted Odds Ratio | 95% CI       |
|------------------------------------|-----------------------|--------------|---------------------|--------------|
| Age (per ten years)                | 0.68 **               | 0.54 to 0.86 | 0.86                | 0.63 to 1.18 |
| Female gender                      | 0.75                  | 0.51 to 1.11 | 0.72                | 0.44 to 1.17 |
| African American Race              | 2.90 †                | 1.97 to 4.26 | 2.27 **             | 1.42 to 3.61 |
| Current smoking                    | 1.88 **               | 1.25 to 2.81 | 1.18                | 0.71 to 1.97 |
| Packyears                          | 1.0                   | 0.99 to 1.01 | 1.0                 | 0.99 to 1.01 |
| Respiratory medications#           | 1.05                  | 0.68 to 1.61 | 1.13                | 0.65 to 1.97 |
| Pre-bronchodilator FEV1            | 0.94                  | 0.76 to 1.16 | 1.01                | 0.70 to 1.44 |
| Emphysema (Perc 15 for every 10HU) | 0.93 *                | 0.88 to 0.99 | 1.0                 | 0.93 to 1.08 |
| Wall Area%                         | 1.13 †                | 1.07 to 1.20 | 1.12 **             | 1.04 to 1.20 |

\*p<0.05. \*\*p,0.01. †p<0.001

FEV<sub>1</sub> = Forced Expiratory Volume in the first second. Perc15 = the density of lung in HU below which 15% of the voxels had the lowest attenuation numbers at full inspiration. Wallarea% = Bronchial wall area at segmental level. #Respiratory medications include one or more of inhaled long acting beta agonists, long acting antimuscarinic agents or a combination of inhaled corticosteroids/long acting beta agonists.

**Table 3: Predictors of Paradoxical Response: Multivariate Logistic regression**

| Variable                             | Adjusted Odds Ratio | 95%CI        |
|--------------------------------------|---------------------|--------------|
| Female Gender                        | 0.96                | 0.76 to 1.22 |
| African American Race                | 1.87†               | 1.48 to 2.36 |
| Current Smoking                      | 1.18                | 0.92 to 1.51 |
| Packyears                            | 1.004               | 1.0 to 1.008 |
| Respiratory Medications#             | 1.10                | 0.83 to 1.44 |
| Pre-bronchodilator FEV <sub>1</sub>  | 0.91                | 0.76 to 1.09 |
| Emphysema<br>(Perc15 for every 10HU) | 0.96*               | 0.92 to 0.99 |
| Wall-area%                           | 1.04*               | 1.01 to 1.08 |
| Age                                  |                     |              |
| Quartile 1 (reference)               | 1.00                |              |
| Quartile 2                           | 1.11                | 0.85 to 1.45 |
| Quartile 3                           | 0.98                | 0.71 to 1.35 |
| Quartile 4                           | 1.05                | 0.73 to 1.52 |

\*p<0.05. †p<0.001

#Respiratory medications include one or more of inhaled long acting beta agonists, long acting antimuscarinic agents or a combination of inhaled corticosteroids/long acting beta agonists. FEV<sub>1</sub> = Forced Expiratory Volume in the first second. Perc15 = the density of lung in HU below which 15% of the voxels had the lowest attenuation numbers at full inspiration. Wallarea% = Bronchial wall area at segmental level.

**Supplemental Figure 1:**

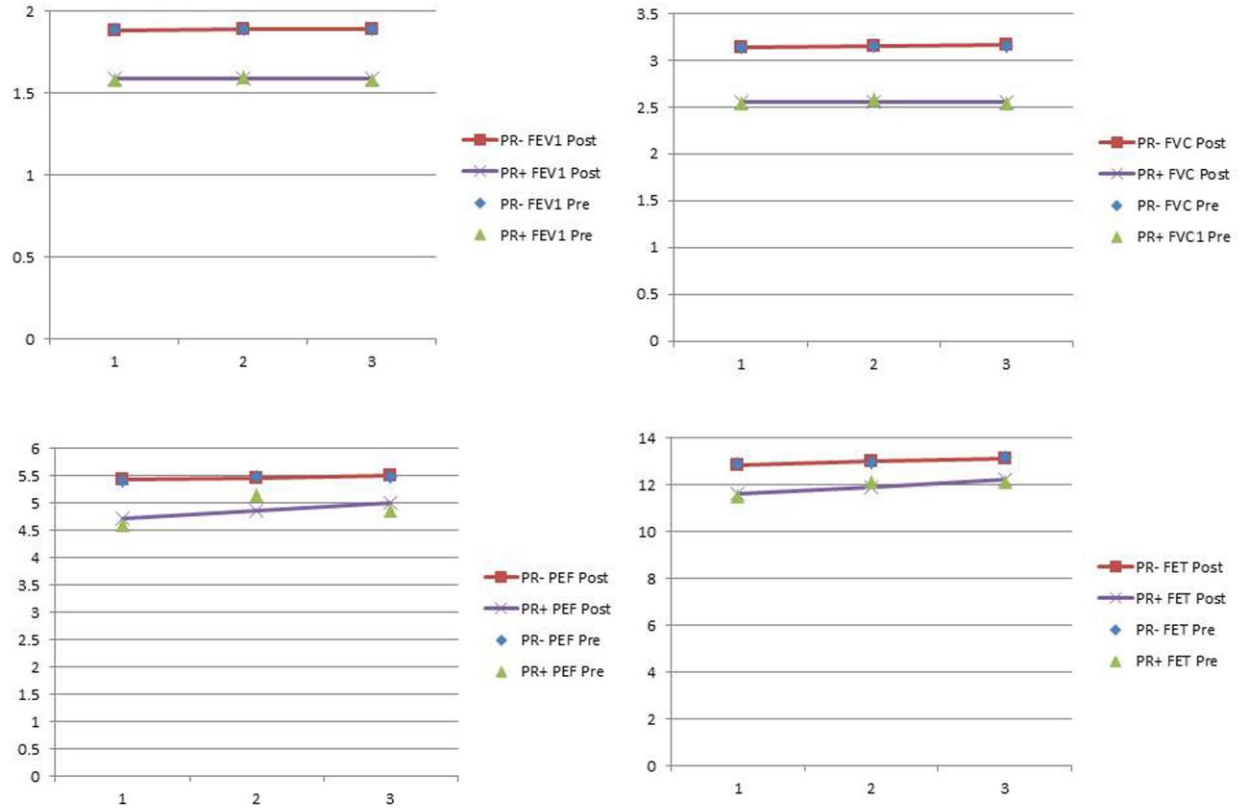

Regression models evaluated linear trends over repeated efforts. We observed that the estimated linear trends of predicting FEV<sub>1</sub>, FVC and PEF are not statistically significant at significance level,  $\alpha=0.05$ . Linear Trend of FET showed an upward movement with repeated efforts in the pre bronchodilator group in the PR- group ( $p = 0.02$ ). FEV<sub>1</sub> = Forced expiratory volume in the first second. FVC = Forced vital capacity. PEF = Peak expiratory flow. FET = Forced expiratory time.
